# Supplementary material
Source: PubMed Central journal article supplement (PMC2802475)

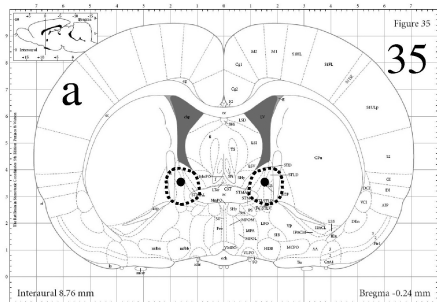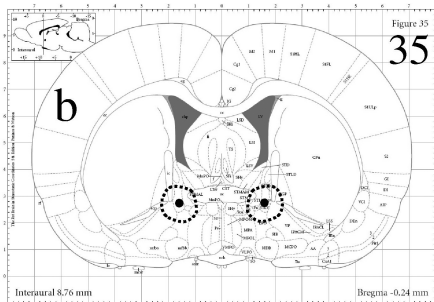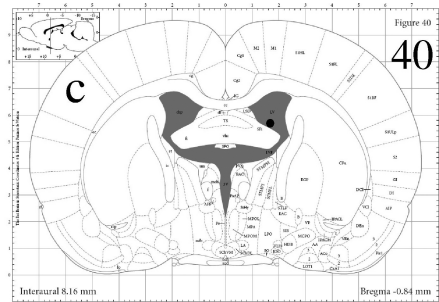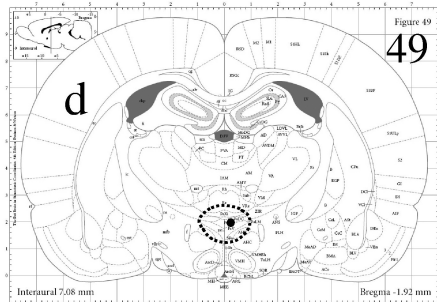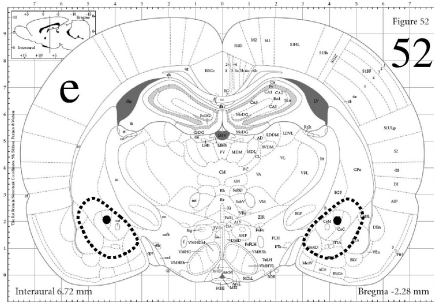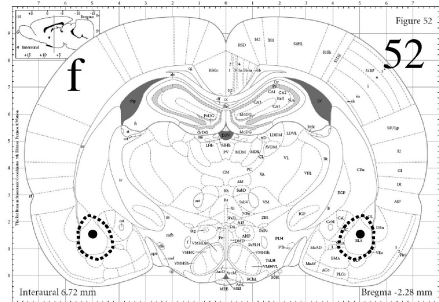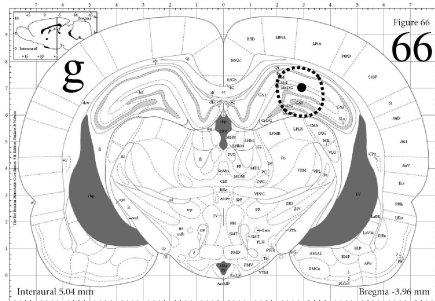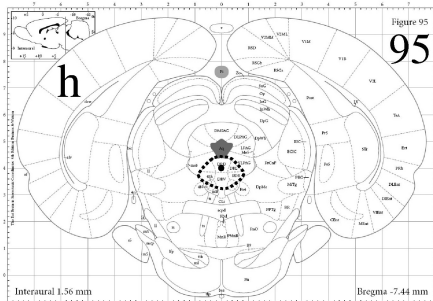

Supplement: supp_109.159186_JPET159186_supplemental_figure.pdf [file supp_109.159186_JPET159186_supplemental_figure.pdf]
